# Supplementary material for: Dried Vegetables as Potential Clean-Label Phosphate Substitutes in Cooked Sausage Meat
Source: Foods. 2023 May 11;12(10):1960. doi: 10.3390/foods12101960 (PMC10216979; doi:10.3390/foods12101960)
Supplement: Supplementary file 1 [file foods-12-01960-s001.zip › foods-2249620-supplementary.pdf]

# Dried Vegetables as Potential Clean-Label Phosphate Substitutes in Cooked Sausage Meat

Ingrid Weigel <sup>1</sup>, Sarah Nistler <sup>2</sup>, Rohtraud Pichner <sup>3</sup>, Silvia Budday <sup>2</sup> and Sabrina Gensberger-Reigl <sup>1,\*</sup>

<sup>1</sup> Food Chemistry, Department of Chemistry and Pharmacy, Faculty of Sciences, Friedrich-Alexander-Universität Erlangen-Nürnberg (FAU), Nikolaus-Fiebiger-Str. 10, 91058 Erlangen, Germany

<sup>2</sup> Institute of Applied Mechanics, Department of Mechanical Engineering, Faculty of Engineering, Friedrich-Alexander-Universität Erlangen-Nürnberg (FAU), Egerlandstr. 5, 91058 Erlangen, Germany

<sup>3</sup> Department of Nutritional, Food and Consumer Sciences, University of Applied Sciences, Leipziger Str. 123, 36037 Fulda, Germany

\* Correspondence: [sabrina.gensberger@fau.de](mailto:sabrina.gensberger@fau.de); Tel.: +49-9131-8565600

**Table S1** Sample formulations for the preparation of sausage meat samples as described in section 2.5.

| Sample           | Minced meat (g) | Sodium chloride solution (mL) <sup>1</sup> | Phosphates solution (mL) <sup>2</sup> | Freeze-dried vegetables (mg) | Ice-cold water (mL) |
|------------------|-----------------|--------------------------------------------|---------------------------------------|------------------------------|---------------------|
| Negative control | 5               | 1                                          | -                                     | -                            | 4                   |
| Positive control | 5               | 1                                          | 1                                     | -                            | 3                   |
| 4.0%             | 5               | 1                                          | -                                     | 200                          | 4                   |
| 3.4%             | 5               | 1                                          | -                                     | 170                          | 4                   |
| 2.8%             | 5               | 1                                          | -                                     | 140                          | 4                   |
| 2.2%             | 5               | 1                                          | -                                     | 110                          | 4                   |
| 1.6%             | 5               | 1                                          | -                                     | 80                           | 4                   |
| 1.0%             | 5               | 1                                          | -                                     | 50                           | 4                   |

<sup>1</sup>concentration: 50 mg/mL

<sup>2</sup>concentration: 30 mg/mL

**Table S2** Attributes that were provided to panelists to indicate their score of acceptance and their translation into LAM values.

| Attribute                   | Value  |
|-----------------------------|--------|
| Greatest imaginable liking  | 100.00 |
| Like extremely              | 87.11  |
| Like very much              | 78.06  |
| Like moderately             | 68.12  |
| Like slightly               | 55.62  |
| Neither like or dislike     | 50.00  |
| Dislike slightly            | 44.69  |
| Dislike moderately          | 34.06  |
| Dislike very much           | 22.25  |
| Dislike extremely           | 12.25  |
| Greatest imaginable dislike | 0.00   |

**Table S3** pH Value in sausage meat containing 4–1% (w/w) freeze-dried Brussels sprouts, Red Kuri squash, or sweet corn (mean  $\pm$  standard deviation).

|                  | Brussels sprouts |            | Red Kuri squash |            | Sweet corn |            |
|------------------|------------------|------------|-----------------|------------|------------|------------|
|                  | Mean pH          | SD*        | Mean pH         | SD         | Mean pH    | SD         |
| Negative control | 5.79             | $\pm 0.03$ | 5.78            | $\pm 0.05$ | 5.79       | $\pm 0.04$ |
| Positive control | 5.88             | $\pm 0.01$ | 5.87            | $\pm 0.03$ | 5.88       | $\pm 0.02$ |
| 4.0%             | 5.81             | $\pm 0.02$ | 5.82            | $\pm 0.03$ | 5.84       | $\pm 0.04$ |
| 3.4%             | 5.81             | $\pm 0.02$ | 5.81            | $\pm 0.04$ | 5.83       | $\pm 0.04$ |
| 2.8%             | 5.81             | $\pm 0.02$ | 5.81            | $\pm 0.04$ | 5.82       | $\pm 0.04$ |
| 2.2%             | 5.80             | $\pm 0.03$ | 5.81            | $\pm 0.04$ | 5.82       | $\pm 0.04$ |
| 1.6%             | 5.80             | $\pm 0.03$ | 5.80            | $\pm 0.03$ | 5.81       | $\pm 0.04$ |
| 1.0%             | 5.80             | $\pm 0.03$ | 5.80            | $\pm 0.04$ | 5.80       | $\pm 0.04$ |

\* SD, standard deviation

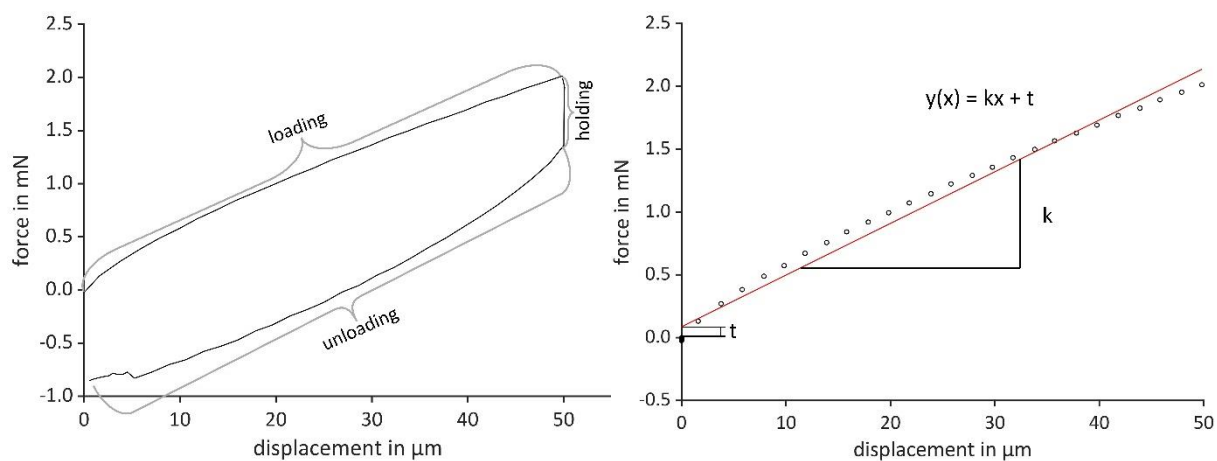

**Figure S1** (a) Resulting curve for indentation test with marked loading-, holding- and unloading phase for a sample containing 4.0% (w/w) Brussels sprouts. (b) Calculated linear regression (red) in loading phase to determine the slope  $k$  that is needed for the calculation of the effective modulus.

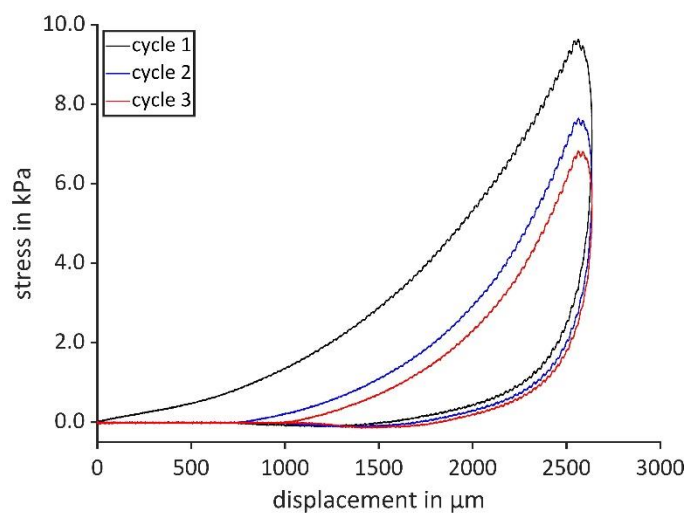

**Figure S2** Typical cyclic compression curves for a sample containing 4.0% (w/w) Brussels sprouts. Three cycles were analyzed: black (first cycle), blue (second cycle), and red (third cycle).

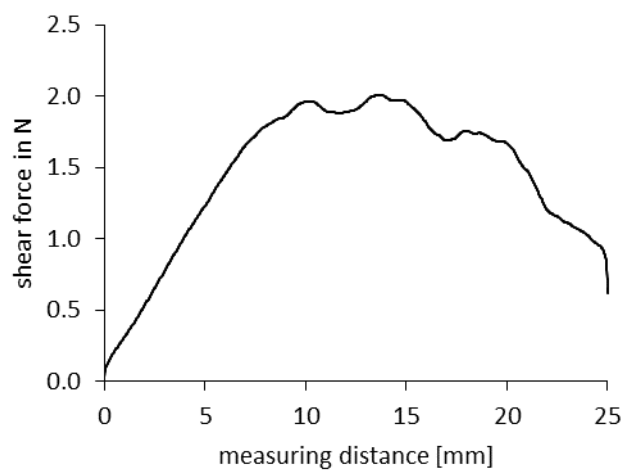

**Figure S3** A typical curve for Warner Bratzler's shear force measurement for a sample containing 4.0% (w/w) Brussels sprouts.
